# Supplementary material for: The Natural History of Initial Antipsychotic Treatment Among Men Admitted to a State Prison
Source: Atypon-hosted journal article supplement (doi:10.1176/appi.ps.202100545), 2022-04-27
Supplement: appi.ps.202100545.ds001.pdf [file appi.ps.202100545.ds001.pdf]

## Demographic characteristics and prescribed index antipsychotic medications

| Characteristic             | N   | %    |
|----------------------------|-----|------|
| <b>Race</b>                |     |      |
| Black                      | 169 | 68.9 |
| White                      | 68  | 27.8 |
| Other                      | 8   | 3.3  |
| <b>Age</b>                 |     |      |
| 23-33 years                | 81  | 33   |
| 34-44 years                | 83  | 34   |
| 45-65 years                | 81  | 33   |
| <b>Gang affiliation</b>    |     |      |
| Yes                        | 32  | 13.1 |
| No                         | 213 | 86.9 |
| <b>Index Prescriptions</b> |     |      |
| Olanzapine                 | 84  | 34.3 |
| Risperidone                | 68  | 27.8 |
| Haloperidol                | 33  | 13.5 |
| Chlorpromazine             | 14  | 5.7  |
| Haloperidol decanoate      | 9   | 3.7  |
| Fluphenazine               | 7   | 2.9  |
| >1 medication              | 7   | 2.9  |
| refused medication         | 6   | 2.4  |
| Fluphenazine decanoate     | 5   | 2.0  |
| Perphenazine               | 4   | 1.6  |
| Ziprasidone                | 3   | 1.2  |
| Aripiprazole               | 2   | 0.8  |
| Thiothixene                | 2   | 0.8  |
| Trifluoperazine            | 1   | 0.4  |

Rates and relative risk (RR) of adverse events during and after stopping antipsychotic medication

|                              | Rate*  |       | RR   | (95% CIs)    | p-value |
|------------------------------|--------|-------|------|--------------|---------|
|                              | During | After |      |              |         |
| Psychiatric hospitalizations | 0.4    | 0.7   | 0.63 | (0.30, 1.30) | 0.208   |
| Emergent suicide assessments | 0.9    | 0.6   | 1.50 | (0.65, 3.42) | 0.340   |
| Days on suicide watch        | 2.8    | 1.7   | 1.61 | (0.32, 8.21) | 0.567   |
| Number of infractions        | 3.1    | 5.3   | 0.58 | (0.36, 0.94) | 0.024** |
| Days assigned to DSEG        | 67.7   | 96.6  | 0.68 | (0.43, 1.08) | 0.102   |

\*per 1000 person-days  
 Disciplinary segregation  
 (DSEG)  
 Confidence intervals (CIs)  
 \*\* p < 0.05
